RESEARCH ARTICLE

# Roles of metacognition and achievement goals in mathematical modeling competency: A structural equation modeling analysis

Riyan Hidayat<sup>1\*</sup>, Hutkemri Zulnaidi<sup>1</sup>, Sharifah Norul Akmar Syed Zamri<sup>1</sup>

Department of Mathematics and Science Education, Faculty of Education, University of Malaya, Kuala Lumpur, Malaysia

✉ These authors contributed equally to this work.

\* [riyan6095@gmail.com](mailto:riyan6095@gmail.com)

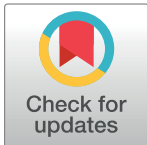

## Abstract

This study investigates the relationship between metacognition and achievement goals which may influence mathematical modeling competency in students of mathematics education programs. The current study employs 538 students of mathematics education program; 483 (89.8%) of whom are male and 55 (10.2%) are aged from 18 years old to 22 years old. The study follows a correlational research design to investigate and measure the degree of relationship amongst mathematical modeling competencies, achievement goals and metacognition. Results indicate that achievement goals and metacognition positively influence mathematical modeling competency. Moreover, four metacognition dimensions including awareness, planning, cognitive strategy and self-checking are positive partial mediators because they increase the association between achievement goals and mathematical modeling competency. In conclusion, metacognition and achievement goals positively affect students' mathematical modeling competency.

## OPEN ACCESS

**Citation:** Hidayat R, Zulnaidi H, Syed Zamri SNA (2018) Roles of metacognition and achievement goals in mathematical modeling competency: A structural equation modeling analysis. PLoS ONE 13(11): e0206211. <https://doi.org/10.1371/journal.pone.0206211>

**Editor:** Zhidan Wang, Jiangsu Normal University, CHINA

**Received:** March 1, 2018

**Accepted:** October 9, 2018

**Published:** November 6, 2018

**Copyright:** © 2018 Hidayat et al. This is an open access article distributed under the terms of the [Creative Commons Attribution License](https://creativecommons.org/licenses/by/4.0/), which permits unrestricted use, distribution, and reproduction in any medium, provided the original author and source are credited.

**Data Availability Statement:** All relevant data are within the manuscript and its supporting information files.

**Funding:** The authors received no specific funding for this work.

**Competing interests:** The authors have declared that no competing interests exist.

## Introduction

Educational researchers have highlighted several key benefits of modeling competencies to the study of intricacy and to modern science [1–3], particularly social science (e.g. economics, information systems, finance, business, education and the arts). Students in high education levels with these competencies are assumed to successfully conduct a research because these competencies involve a rigorous scientific procedure [4]. Surprisingly, mathematical analysis and modeling are widely used by policy makers and industrialists for guidance and decision making [5]. However, the application of a mathematical modeling process in mathematical classrooms is a new challenge for primary school [6], secondary school [7–9] and even higher education students [3, 10, 11], particularly mathematics education program students [12–14]. Previous studies have emphasised that students have difficulty interpreting real contexts into mathematical contexts [9, 15, 16]. For example, in a study conducted by Blomhøj and Kjeldsen [10], students encountered problems on mathematising the expression 'proportional to the square of population size' before finding formula.

Modeling behaviour is complex, persistent and repetitive. Few studies have been conducted on understanding factors that may influence students' mathematical modeling competency [17–21]. A few potential influencing factors are goal oriented [22, 23] and metacognition [16, 24–26]. Zimmerman and Campillo [27] argued that students must not only have sufficient knowledge in solving a complex problem but also have strong motivation and personal resourcefulness to carry out the challenge. Goal oriented [28] and metacognition [29] are regarded as part of the definition of mathematical modeling competency [30]. Therefore, goal-oriented and metacognitive competencies are no longer regarded as positive side impacts on but are significant constituents of mathematical modeling competency. To our knowledge, the effects of achievement goals and metacognition on students' mathematical modeling competency have not been examined.

In this study, we proposed to extend existing mathematical modeling competency literature by discussing these associations in the context of real-life problems. This study investigated the relationship between metacognition and achievement goals which may influence the mathematical modeling competency in students of mathematics education programs. This research also focused on the direct and indirect effects of the relationship between achievement goals and mathematical modeling competency. The indirect effects are the mediating effects of four metacognition dimensions, namely, awareness, planning, cognitive strategy and self-checking. The active agents of metacognition have received less attention in existing literature [31]. Thus, the examination of four metacognition sub-constructs is valuable. The research questions that guided the study are as follows:

1. Do metacognition and achievement goals directly affect mathematical modeling competency?
2. Do the four metacognition sub-constructs play a mediating role in achievement goals and mathematical modeling competency?

## Literature review

### Mathematical modeling competency

Modeling, also known as mathematising or mathematisation [32, 33], refers to a process of organising representational descriptions [34] within which symbolic means and model formal structures or formal structures emerge [35, 36]. This process is usually considered a group activity [37]. However, a different view exists when mathematical modeling is implemented in curricular debate. A mathematical modeling perspective states that it integrates data into examples [38], whereas others believe that mathematical modeling is a conclusion in itself and is not a means to reach other mathematical learning ending.

Mathematical modeling competency is defined in three different parts of competence: cognitive, affective and metacognitive competencies [30]. Affective and metacognitive competencies are no longer considered as merely positive side impacts of mathematical modeling but became significant constituent parts of mathematical modeling. In cognitive competencies, modeling competency is closely associated with the definition of the modeling process [29, 39]. For example, Blum [40] regarded mathematical modeling competency as the capability of identifying pertinent questions, variables, relations or assumptions in a given real-world situation by mathematising these into mathematics and interpreting and validating the solution of the resulting mathematical problem in relation to the given situation. They also conceptualised mathematical modeling competency as the capability of analysing or comparing given models

by exploring the assumptions being made and checking the properties and scope of a given model. Metacognition associates with the factors that support cognition, whereas affective competencies are related to beliefs in mathematics, the nature of problems and the value of mathematics in solving real problems [30]. The latter definition is in line with that of Maaß [29], who included goal oriented or affective goal [28] and the willingness to situate these into action.

The mathematical modeling competency in the current research was evaluated using eight elements: simplifying assumptions; clarifying the goal; formulating the problem, assigning variables, parameters and constants; formulating mathematical statements; selecting a model; interpreting graphical representations; and relating back to the real situation [41]. This procedure is referred to as micro assessment [37]. In this research, the effects of mastery goal orientation and metacognition on mathematical modeling competency were examined.

### Relationship between metacognition and mathematical modeling competencies

Metacognition, which involves psychological and cognitive concepts [42], refers to people's knowledge or cognitive activity on their own cognitive processes and products or anything associated with them [43, 44]. O'Neil and Abedi, [45] operationally interpret students' metacognitive inventory as a construct involving the following sub-scales or sub-behaviors: planning, self-checking, cognitive strategy, and awareness. This construct of metacognition is in line with the definition of metacognition in prior literature [46–48]. The term of planning is that students have to have a goal (either assigned or self-directed) and a plan to reach the goal; self-checking refers to where students necessitate a self-checking mechanism to observe goal achievement; awareness is that the process is conscious to the individual. Interestingly, the term of cognitive strategy used in the current research rather than strategy only is that cognitive strategy refers to reflection on cognitive abilities and activities during the accomplishment of an assignment (for example, determining on the several ways of solving mathematical modeling task).

Metacognition is also classified as higher order thinking [49] that entangles active control over the cognitive processes engaged in learning process [50]. Metacognition is also an important strategy connected to mathematics achievement [51–55] and problem-solving skills [56]. Many studies have confirmed the importance of metacognition in improving mathematical modeling competency. Metacognition influences the development of modeling strategies of students when the effects of four metacognitive dimensions, namely, awareness, planning, cognitive strategy and self-checking, are considered [21]. Students who conduct better self-check show higher growth in their modeling competencies than those who are less skillful in self-checking. Cognitive strategy and planning skills also mediate development in modeling competencies. After some experience with modeling is achieved, students with increased skills in the two metacognitive dimensions carried out modeling better. However, the cognitive and metacognitive activities did not happen sequentially in the process; they established simultaneous and intertwined process in modeling, through which planning activities are most common, whereas prediction activities are least common [57].

Modeling problems are known as difficult tasks. Thus, metacognitive strategies are valuable in a modeling-oriented classroom. Metacognition is activated in difficult tasks [58]. Pennequin, Sorel, Nanty and Fontaine [59] found that metacognition boosts the use of general strategies such as task analysis, problem representation, prediction, planning, monitoring, checking, reflection and evaluation of success. The use of metacognitive strategies in classrooms enables students to be sensitive in understanding a problem appropriately and making few errors in

the learning process, thereby improving their self-regulation skills and self-confidence [60]. However, numerous studies have also indicated that metacognition provides a diverse total of variance towards mathematics performance. For example, metacognitive knowledge and skills explain 42% of the total variance of mathematics achievement [61], whereas metacognitive experience merely explains 4% of the total variance of mathematics achievement [54].

Metacognition, which comes from studies in other domains, positively impacts problem-solving skills [62]. Although students spent little time organising or representing information (drawing/summarising) and even less time reviewing the progress and results of their performance, distinctions are found between accurate and inaccurate students in the metacognitive process during solving math problems [62]. They also discovered that accurate students pay significant attention to time planning (especially drawing and summarising); thus, they do not assess their progress and results. Interestingly, metacognitive training is mainly useful to low achievers as it allows them to progress and solve the same number of tasks [63].

Students regularly assisted with metacognitive and self-reflective activities focused on learning deeply and engaged and motivated throughout the study [63]. However, the role of metacognition in the mathematics problem differs for students with and without learning difficulties. Metacognition does not work well with learning difficulties [64] even when correlated to the mathematics problem [65]. For example, students with learning difficulties indicate a much lower mean score in recognising the sequence of steps to solve the tasks than those without learning difficulties [65].

### Relationship between achievement goals and mathematical modeling competencies

Achievement goals involve the purposes [66] or cognitive-dynamic manifestations [67] of achieving, developing or demonstrating high rather than low ability [68]. Purposes used in the conceptualisation of achievement goals are reasons behind engaging in achievement behaviour (to develop or demonstrate competence) and the objective pursued whilst engaging in achievement behaviour (objective/intrapersonal or normative competence) [69]. Different frameworks of achievement goal theory are available [66, 68, 70]. However, the six-component model of goal orientation, which involves task approach, task-avoidance, self-approach, self-avoidance, other-approach and other-avoidance [69], is the latest framework used in the current study. Elliot et al. [69] included task- and self-based goals under a single concept in which both exert an evaluative standard, such as mastery goal. Other-based goals are a direct analogue of performance goal. Competence in mastery and performance is conceptualised as approach or avoidance. Mastery-oriented goals (i.e. mastery and performance goals) are related to positive educational results, whereas avoidance goals (i.e. mastery- and performance-avoidance goals) often influence negative outcomes [71].

The positive relationship between achievement goals and mathematical modeling competency is obtained from considerable research in other domains. Previous studies have demonstrated that achievement goals correlate positively with students' academic achievement [72–74] and problem-solving success [75]. Thus, students with high achievement goals should also have high performance in mathematical modeling competency. However, we could not find a research that documented the relationship between students' mathematical modeling competency and achievement goals.

Modeling is usually regarded as a group activity [37]. Thus, mastery goals are useful. Mastery goals influence student relations, such as teacher–student relations, peer inclusion, peer conflict [76] and interest in the activity [77]. Mastery-oriented students are discovered to assess collaboration with respect to its contribution to learning, friendship and class cohesion

and to be ready to collaborate with peers regardless of their social group membership [78]. Hagstrom and White [79] reported that success in solving problems is significantly linked to shared talk. This deduction reflects the importance of socially shared talk in the development of problem-solving strategies. Ferri and Lesh [80] reported that the modeling cycle can be managed goal orientedly if students have learned to talk and reflect on mathematical concepts and their own means of understanding mathematics.

For the learning task achievement, students in mastery goal environment concentrate on self-referent standards and the manageability and positive value of the learning task [81]. Mastery goal and a high level of involvement with a creative task are useful for students in reflecting on problem-solving strategies [51]. Stillman, Brown and Galbraith [82] found that students' motivation for choice of real-world problematic situation to model, decision making on an approach and reporting of findings are particularly mastery-oriented rather than performance-oriented. Belenky and Nokes-Malach [83] highlighted that the mastery goal construct also allows students to develop knowledge, which is sufficiently conceptual and abstract, and transform it to a new problem-solving situation. Similarly, mastery goal is positively related to deep learning [84–86] and effective strategy use [66, 74].

Students who have mastery goal orientation can understand problems in several manners, devise a plan, carry out the plan and recall [75]. This skill is important in executing mathematical modeling tasks. For example, an effective and successful approach to mathematical modeling is the appropriate consideration of some relevant and irrelevant information in task requirements. Students need to plan what they should execute in solving a problem. Given that the planning stage refers to reading task materials, activating prior knowledge and motivational beliefs and forming initial goals for problem representation [87], goal orientation can be activated. Lazonder and Rouet [88] demonstrated that students with mastery goal orientation may strongly develop implicit goals in various text sections for problem representation.

Mastery goal consists of task- and self-based goals. However, Elliot et al. [69] indicated that task- and self-based competencies are not always appropriate towards all situations and should be separated into two entities depending on certain circumstances. Task-based goals predict academic self-concept [89], exam performance [90], perceived competence [73] and material absorption in class [69]. Self-based goals are unrelated to material absorption [69] and perceived competence [73]. Self-based and self-avoidance goals require abundant help-seeking [91]. However, self-based goal also predicts academic self-concept [89].

Performance goals (maladaptive) are classified by challenge avoidance and minimal perseverance in face of difficulty [68, 92]. The application of a performance goal in mathematical lessons is assumed to generate susceptibility to a 'helpless' scheme of reactions in accomplishment settings [67], such as a choice for simple or complicated tasks, withdrawal of effort in face of failure and mitigation of task enjoyment. Thus, performance goals predict surface strategy [86]. Performance goals, which refer to other-based goals, can predict positive learning outcomes [71]. However, this concept presents an insignificant relationship with CGPA [93, 94]. Further evidence comes from negative correlations between other-approach goals and exam performance [90], and students with other-approach goals necessitate considerable help-seeking [91]. Empirical studies have also indicated that other-avoidance goals are negatively associated with GPA [95].

### Relationship between achievement goals and metacognition

A robust goal intention does not ensure the achievement goals because students may fail to deal effectively with self-regulatory problems during goal striving [96]. Hence, goal orientation, which is a phase and sub-process of self-regulation, aims to integrate metacognitive

processes (e.g. planning and strategy use) and social cognitive motives [27]. Metacognition is an important strategy that is connected to learning results [97, 98]. Many researchers have also indicated that goal orientation is closely associated with students' metacognition [94, 99–101].

Zafarmand [102] found that, amongst three sub-constructs of goal orientation, mastery goal positively affects metacognitive awareness planning and monitoring, whereas performance goal is negatively related to metacognition. Students with good mastery goals are more likely to hold better metacognition than those with performance goals. Similarly, students' views of mastery and performance goals indicated significant relationships with metacognitive self-regulation [103]. However, when mediated by learning style and self-efficacy, mastery and performance goals exhibited insignificant or no relationship with metacognition [104]. Moreover, students with performance-avoidance goals became involved in low levels of metacognitive activity [105]. Hence, we hypothesised that achievement goals, which involve mastery and performance goals, would positively affect students' metacognition.

Metacognition of students mediates mastery goals and academic success [93, 94]. Students' characteristics related to the mastery goal orientation can be self-regulated using self-monitoring and organizational strategies and are adaptive to failing in particular tasks [106]. Bonnett et al. [51] found that mastery goal orientations enhance metacognitive reflection on learning strategies and increase engagement [99]. Mathematics engagement involves the simultaneous recruitment of motivational and affective structures to guide sustained, productive learning behavior. However, the mediating effects of metacognition on mastery and performance goals differ. Coutinho [107] confirmed the partial mediator role of metacognition in mastery goals and academic success but no mediating effect is found between performance goals and academic success. Metacognition should influence academic success according to prior research. Thus, we hypothesized that metacognition indirectly affects mathematical modeling competency. The indirect influences in this research are the mediating effects of four metacognition dimensions, namely, awareness, planning, cognitive strategy and self-checking, on achievement goals and mathematical modeling competency.

## Summary of the hypotheses

The three main hypotheses of this study are as follows:

Hypothesis 1. There will be no significant relationships between achievement goals and mathematical modeling competency.

Hypothesis 2. There will be no significant relationships between four metacognition dimensions, namely, awareness, planning, cognitive strategy and self-checking and mathematical modeling competency

Hypothesis 3. The Relationships between achievement goal and mathematical modeling competency will not be mediated by awareness, planning, cognitive strategy and self-checking.

## Method

### Participants and procedure

The study was approved by *Dinas Penanaman Modal dan Pelayanan Terpadu Satu Pintu* (DPMPTSP or Department of Investment and Integrated One Stop Services, Riau Province Government—Indonesia). The first approval letter from the University of Malaya, Jalan Universiti, 50603 Kuala Lumpur, Wilayah Persekutuan Kuala Lumpur—Malaysia, was sent to DPMPTSP and the agency, in return, sent this approval letter together with their own consent

letter to three research sites in Indonesia—Universitas Riau, Universitas Islam Negeri Sultan Syarif Kasim and Universitas Islam Riau, introducing both the intent of the project and the purpose of the study. Finally, the researcher administered survey to participating university ranging from one to two month timescale [108].

The population of this research was composed of students of a mathematics education program in Indonesia. These students were selected because of their mathematics course and modeling experiences commonly found amongst mathematics education programs. For example, they registered for some advanced courses, such as calculus, geometry, linear algebra, linear program and statistics. As a result, they were assumed to implicitly learn the process of mathematical modeling competency. This study selected groups rather than individuals; thus, cluster random sampling was suitable [108]. The current study employed 538 students of a mathematics education program in Riau Province, Indonesia. The female participants were 483 (89.8%), whereas the male participants were 55 (10.2%) with ages ranging from 18 years old to 22 years old. The gender disproportion in the departments of mathematics education program resulted in a large proportion of female participants. The academic year of the targeted students were the first year until the fourth year in school year 2017–2018. However, the current research only used the first, second and third years, because the fourth academic year students were in practical session. The students enrolled in the first academic year were 133 (24.7%), those in the second academic year were 223 (41.4%) and those in the third academic year were 182 (33.8%). Participants were invited to take part in the research by providing them a letter covering information about the aim of the study, tasks involved, the advantage and risks involved in following this research, and the confidentiality of their answers. All students from selected universities completed the survey, which was voluntary, during lecture hours. They also completed the questionnaire covering 22 items in mathematical modeling test, 20 items in metacognitive inventory and 12 items in the  $3 \times 2$  achievement goal questionnaire. All classes of the mathematics education program took 45 min to 60 min to answer all questions.

## Measures

The translation preciseness of the original questionnaire was confirmed using back translation. Before the items were piloted, the questionnaire was translated from English by the authors and then translated back into Indonesian language by a bilingual language expert. The Indonesian version of the questionnaire indicates a similar factor structure to the original questionnaire. The three types of questionnaire were a mathematical modeling test constructed by Haines et al. [41], the  $3 \times 2$  achievement goals adopted from Elliot et al. [69] and metacognitive inventory by O'Neil and Abedi [45]. The following sections begin with a mathematical modeling test, the  $3 \times 2$  achievement goal questionnaire and then proceeds with sections on metacognitive inventory. All these instruments were piloted before the actual study was conducted.

**Mathematical modeling competency test.** The first instrument employed in this study was a mathematical modeling test containing real-world situations to investigate students' mathematical modeling competency. The mathematical modeling test was originally developed by Haines et al. [41]. Firstly, the mathematical modeling test only measured 6 mathematical modeling competencies using 12 multiple-choice questions (5 alternative choices). They involved simplifying assumptions; clarifying the goal; formulating the problem; assigning variables, parameters and constants; formulating mathematical statements; and selecting a model. Competencies in mathematical modeling were then extended containing graphical representations and exploring real and mathematical world connections [37, 109]. However, it did not include competencies in solving mathematics, refining a model and reporting [41]. Students

who correctly answered each multiple-choice format in the instrument were given 2 points, those with 1 or several partial correct answers were given 1 point and those with one incorrect answer were given 0 point. A total of 22 questions were used in the mathematical modeling test (maximum score is 44).

The reliability of the questions for mathematical modeling test was determined by discriminant index, difficulty index and Cronbach's alpha by utilising the ANATES4 software. The value of the discrimination index for each item of the mathematical modeling test ranges from 24.55% to 57.27%. Therefore, several items are fairly good (two items) discrimination index, good (13 items) and very good (seven items). The value of the difficulty index for each item of the mathematical modeling test is between 31.36% and 56.82%. Therefore, all items possess a difficulty index at a moderate level. The reliability value of the mathematical modeling test (0.82) is good [110]. Hence, in the research, each item of the mathematical modeling competency was retained to examine the mathematical modeling competency of students.

**The 3 × 2 achievement goal questionnaire.** The questionnaire used was adopted from Elliot et al. [69], and it consists of six sub-constructs classified into mastery goals including task-approach, task-avoidance, self-approach and self-avoidance goals, as well as performance goals such as other-approach and other-avoidance goals. Each sub-construct contains three items (task-approach goal, 'to obtain several questions right on the exams in this class'; task-avoidance goal, 'to avoid incorrect answers on the exams in this class'; self-approach goal, 'to perform better on the exams in this class than I have done in the past on these types of exams'; self-avoidance goal, 'to avoid doing worse on the exams in this class than I normally do on these types of exams'; other-approach goal, 'to outperform other students on the exams in this class'; and other-avoidance goal, 'to avoid doing worse than other students on the exams in this class'). The questionnaire comprises of 18 questions measured on seven-point Likert-type scale, which reflect four sub-constructs. A 7-point scale ranging from 1 ('strongly disagree') to 7 ('strongly agree') was used in the 3 × 2 achievement goal questionnaire [111].

In the current research, reliability values of some scales exceeded the desirable standard of 0.70 (task-approach goal,  $\alpha = 0.90$ ; task-avoidance goal,  $\alpha = 0.93$ ; self-approach goal,  $\alpha = 0.94$ ; self-avoidance goal,  $\alpha = 0.97$ ; other-approach goal,  $\alpha = 0.90$ ; and other-avoidance goal,  $\alpha = 0.88$ ). All the CR values for the sub-construct achievement goals ranged from 0.88 to 0.97, which exceeded the desirable standard of 0.6. Therefore, a high internal consistency was obtained. Moreover, the average variance extracted (AVE) for the six latent variables ranged from 0.71 to 0.92, which also exceeded the common cut-off value of 0.5. Therefore, this study exhibited acceptable discriminant validity.

**Metacognitive inventory questionnaire.** The third instrument employed in this study was the metacognitive inventory to investigate the metacognition of students. The metacognitive inventory was originally constructed by O'Neil and Abedi [45] and was modified and used by Yildirim [21] in modeling competency. The instrument involved four sub-constructs consisting of 20 statements with five statements per sub-construct. The sub-constructs of the instrument are awareness (e.g. I am aware of what modeling strategies to use and when to use them to solve an exercise), cognitive strategy (e.g. I attempt to discover the main ideas in an exercise), planning (e.g. I try to understand the goals of an exercise before I attempt to solve it) and self-checking (e.g. I check my accuracy as I progress through the solution). A 5-point scale of strongly disagree (1), disagree (2), uncertain (3), agree (4) and strongly agree (5) was used in the metacognitive inventory questionnaire. Cronbach's alpha internal consistency reliabilities of the four metacognition sub-constructs (awareness,  $\alpha = 0.83$ ), (cognitive strategy  $\alpha = 0.85$ ), (planning  $\alpha = 0.84$ ) and (self-checking,  $\alpha = 0.83$ ) were above the minimum common cut-off value of  $\alpha > 0.70$ . All the CR values for the metacognition sub-constructs ranged from 0.83 to 0.85, which exceeded the desirable standard of 0.6. Therefore, a high internal consistency was



obtained. Moreover, the AVE for the four latent variables ranged from 0.50 to 0.54, which also exceeded the common cut-off value of 0.5. Therefore, this study achieved acceptable discriminant validity.

## Data analysis

Prior to further analysis, several issues related to data screening, such as handling missing data, multicollinearity and identification of outliers and normality, were considered using Statistical Package for the Social Sciences 23.0 program. Outliers were identified by box plot for each sub-construct. The benchmark of the univariate normality of construct in a measurement model for a latent variable was that the skewness and kurtosis values for each item ranged from  $-1.96$  to  $1.96$  at 0.05 significant level [112]. Multicollinearity occurs when the correlation matrix with correlations was more than 0.90 [113].

CFA procedures were applied using AMOS 18.0 to investigate whether the established dimensionality and factor-loading pattern fitted Indonesian context. Awang [114] evaluated goodness of fit by using chi-square ( $\chi^2$ ) ( $P > 0.05$ ), comparative fit index ( $CFI > 0.90$ ), Tucker–Lewis index ( $TLI > 0.90$ ) and root mean square error of approximation ( $RMSEA < 0.08$ ). Cronbach's alpha coefficients, composite reliability (CR) and AVE were calculated to determine the reliability of the instrument (total and sub-constructs) and split-half correlations. Alpha values in the current research were not expected to be comparatively high. Hair et al. [112] indicated that exploratory research alpha values of 0.60–0.70 are satisfactory. CR should also be more than 0.60, whereas AVE should be over 0.50 [114].

## Mediator analysis

A mediator (intervening variable) distributes the effect of an independent variable to a dependent variable [115]. The current research used two types of mediator [116]. Firstly, when no significant relationship or direct effect exists between independent variable (achievement goals) and dependent variable (mathematical modeling competency), full mediating effect or complete mediation occurs. Secondly, when a direct effect exists between the causal variable (achievement goals) and the outcome variable (mathematical modeling competency), partial mediating effect or partial mediation happens. To determine the extent of the effect of a mediator on the total effect on the outcome variable, the significance of the indirect effects was determined using AMOS software and Sobel test.

## Results

### Preliminary analysis

The amount of missing data in this research varied from 0% to 0.5% per item. These missing data were completely at random [113]. The means, standard deviations, correlation matrix, skewness and kurtosis for all variables are shown in Table 1.

Table 1 shows that the results of preliminary analysis all of the items of the measures of mathematical modeling competency, achievement goals, awareness, cognitive strategy, planning, and self-checking reach univariate normality (skewness and kurtosis values are from  $-0.974$  to  $2.343$ ). In terms of multicollinearity, inter-correlations amongst the four metacognition sub-constructs ranged from 0.486 to 0.559, and those for the six achievement goal sub-constructs ranged from 0.473 to 0.611. Therefore, the discriminant validities of the variables were reached because the correlation matrix with correlations was less than 0.90 [114]. The mean value for mathematical modeling competency is ( $M = 0.898$  and  $SD = 0.318$ ). The mean value for achievement goals is ( $M = 5.296$  and  $SD = 0.913$ ). The mean values for metacognition

**Table 1. Means, standard deviations, and Pearson correlations between mathematical modeling competency, achievement Goals and sub-construct of metacognition.**

| Variable                         | Mathematical modeling competency | Achievement Goals | Awareness | Cognitive Strategy | Planning | Self-Checking |
|----------------------------------|----------------------------------|-------------------|-----------|--------------------|----------|---------------|
| Mathematical modeling competency | 1                                | .456**            | .412**    | .454**             | .421**   | .421**        |
| Achievement Goals                |                                  | 1                 | .427**    | .538**             | .480**   | .481**        |
| Awareness                        |                                  |                   | 1         | .559**             | .486**   | .489**        |
| Cognitive Strategy               |                                  |                   |           | 1                  | .535**   | .475**        |
| Planning                         |                                  |                   |           |                    | 1        | .528**        |
| Self-Checking                    |                                  |                   |           |                    |          | 1             |
| Skew                             | 0.093                            | -.974             | -.133     | -.658              | -.124    | -.154         |
| Kurtosis                         | -0.136                           | 1.710             | .842      | 2.343              | .087     | .106          |
| M                                | 0.898                            | 5.296             | 3.940     | 3.7372             | 3.9517   | 3.910         |
| SD                               | 0.318                            | .913              | .552      | .668               | .584     | .637          |

Note:

\*\* . Correlation is significant at 0.01 level (2-tailed).

<https://doi.org/10.1371/journal.pone.0206211.t001>

vary amongst sub-constructs awareness (M = 3.940 and SD = 0.552), cognitive (M = 3.737 and SD = 0.668), planning (M = 3.951 and SD = 0.584) and self-checking (M = 3.910 and SD = 0.637).

The analysis of the correlations indicated that the correlation between mathematical modeling competency and achievement goals was significant and weak ( $r = .456, p < 0.05$ ), mathematical modeling competency and awareness was significant and weak ( $r = .412, p < 0.05$ ), mathematical modeling competency and cognitive strategy was significant and weak ( $r = .454, p < 0.05$ ), mathematical modeling competency and planning was significant and weak ( $r = .421, p < 0.05$ ), mathematical modeling competency and self-checking was significant and weak ( $r = .421, p < 0.05$ ), achievement goals and awareness was significant and weak ( $r = .427, p < 0.05$ ), achievement goals and cognitive strategy was significant and moderate ( $r = .538, p < 0.05$ ), achievement goals and planning was significant and weak ( $r = .480, p < 0.05$ ), achievement goals and self-checking was significant and weak ( $r = .481, p < 0.05$ ), awareness and cognitive strategy was significant and moderate ( $r = .559, p < 0.05$ ), awareness and planning was significant and weak ( $r = .486, p < 0.05$ ), awareness and self-checking was significant and weak ( $r = .489, p < 0.05$ ), cognitive strategy and planning was significant and moderate ( $r = .535, p < 0.05$ ), cognitive strategy and self-checking was significant and weak ( $r = .475, p < 0.05$ ), and planning and self-checking was significant and moderate ( $r = .528, p < 0.05$ ).

### Testing the measurement models

CFA procedures were conducted to verify the factorial validity of the four sub-constructs of metacognition and the six sub-constructs of achievement goals. The measurement model of achievement goals resulted in acceptable model fit,  $\chi^2 = 191.35, \chi^2/df = 1.60$  CFI = 0.98, TLI = 0.99 and RMSEA = 0.033. Fig 1 was the standardized coefficients acquired from the CFA that indicated the relationships between factors and items for achievement goals.

Fig 1 showed all loadings of items were between 0.80 and 0.98. This exceeded the common cut-off value of 0.5 [112]. In addition, the measurement model of metacognition also indicated acceptable model fit,  $\chi^2 = 325.454, \chi^2/df = 1.98$  CFI = 0.97, TLI = 0.96 and RMSEA = 0.043.

Fig 2 was the standardized coefficients acquired from the CFA that indicated the relationships between factors and items for metacognition.

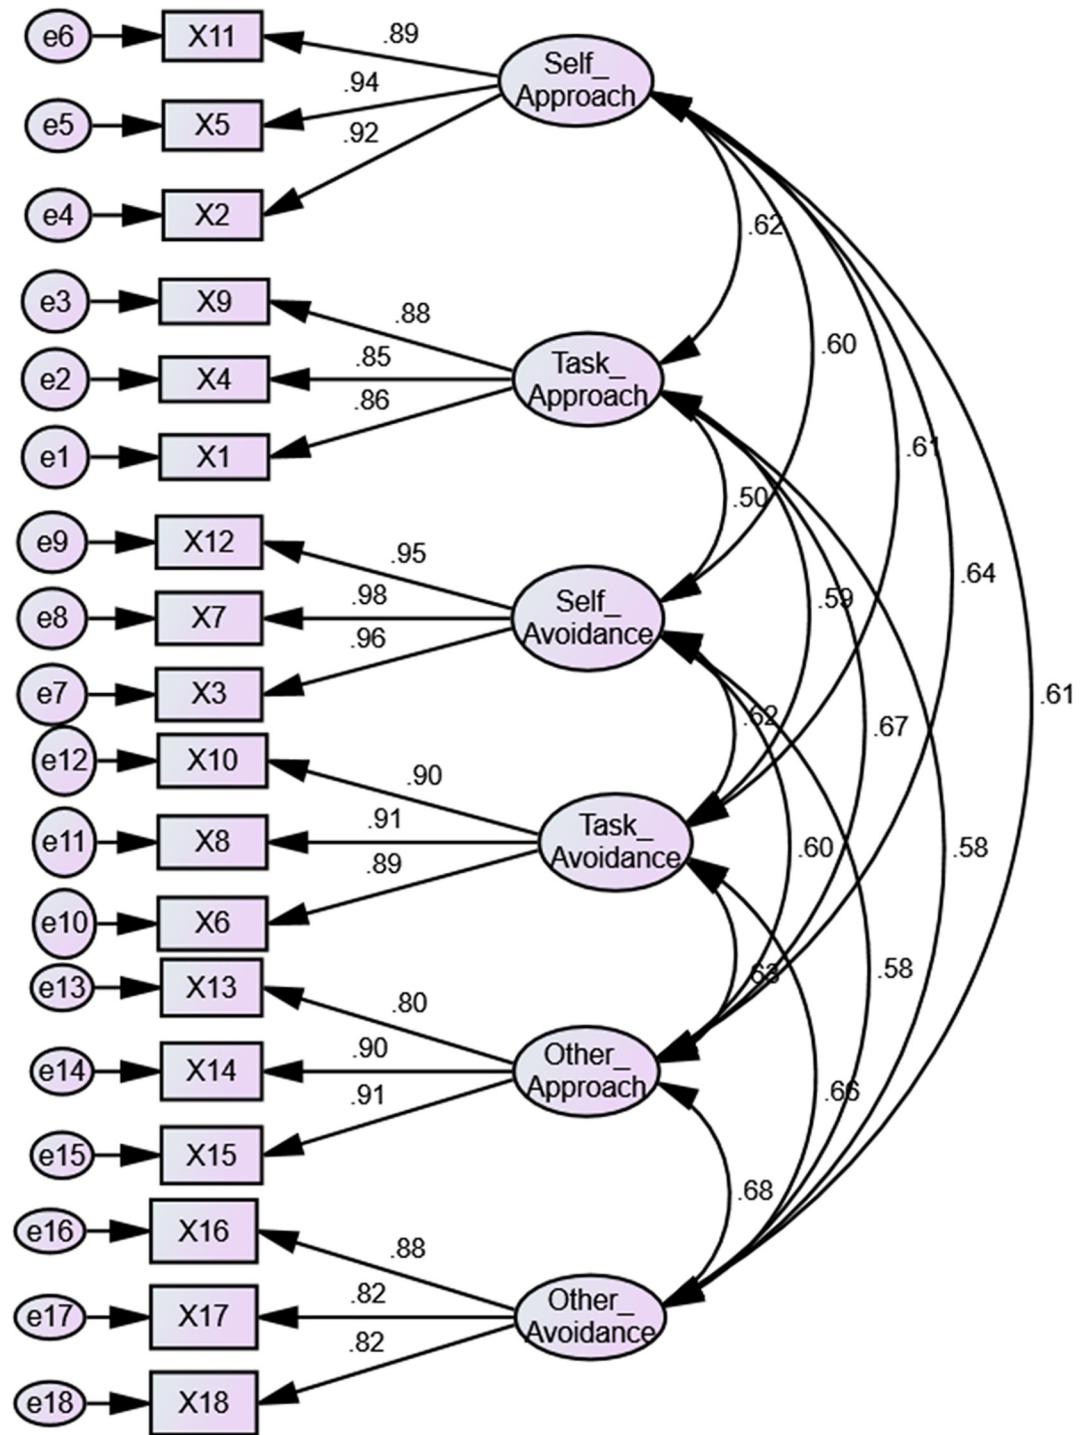

Fig 1. Confirmatory factor analysis path diagram for achievement goals.

<https://doi.org/10.1371/journal.pone.0206211.g001>

Fig 2 indicated all loadings of items were between 0.64 and 0.78. This exceeded the common cut-off value of 0.5 [112]. Moreover, the measurement model of mathematical modeling competency also indicated acceptable model fit,  $\chi^2 = 232.916$ ,  $\chi^2/df = 1.29$  CFI = 0.98, TLI = 0.97 and RMSEA = 0.023. Fig 3 was the standardized coefficients obtained

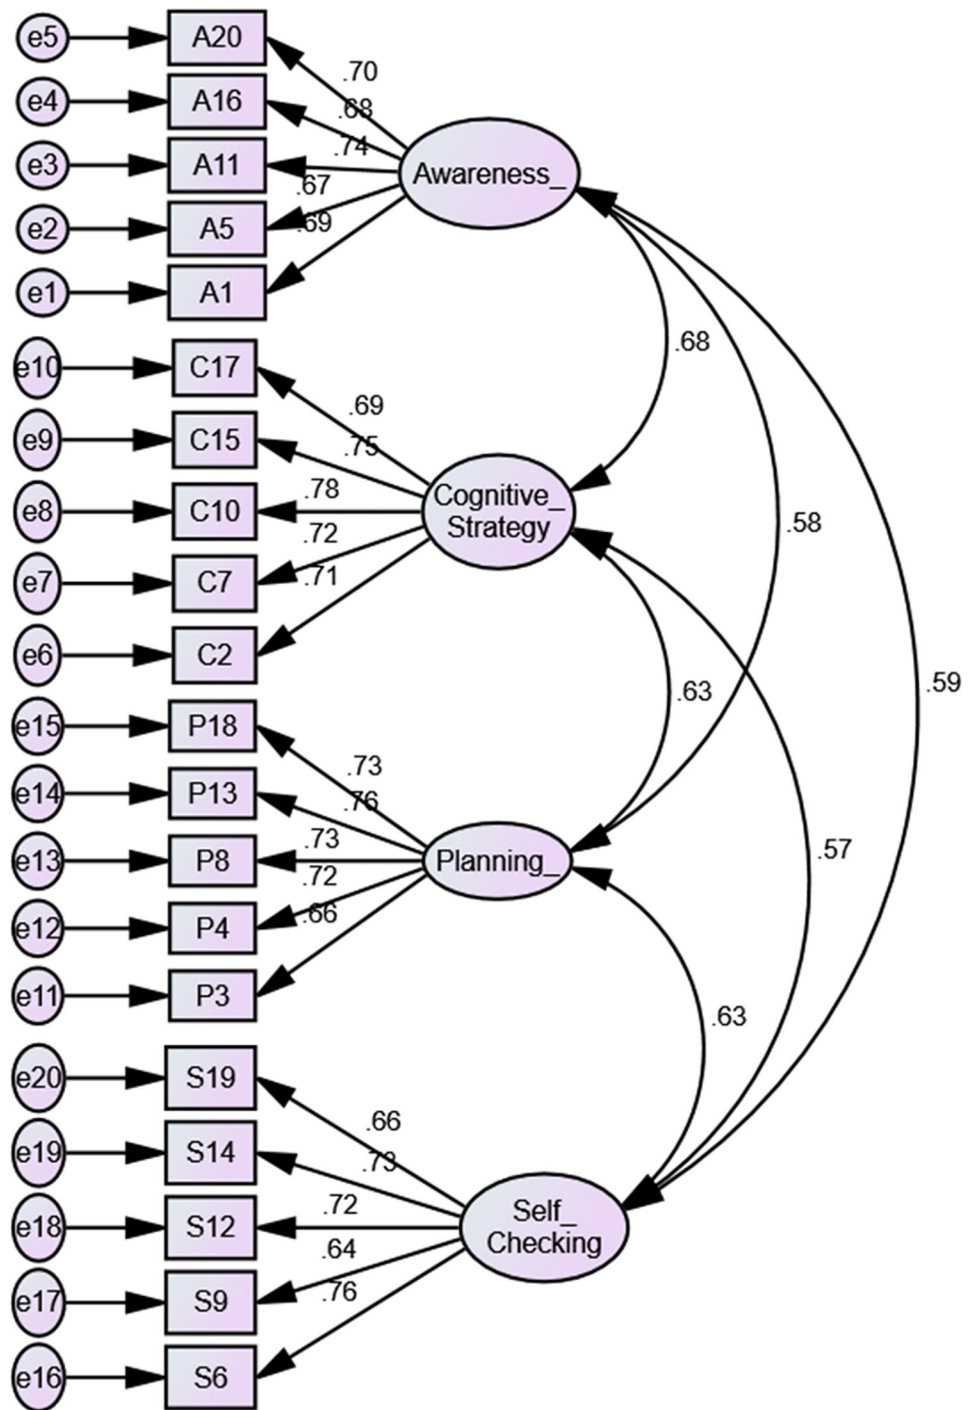

Fig 2. Confirmatory factor analysis path diagram for metacognition.

<https://doi.org/10.1371/journal.pone.0206211.g002>

from the CFA that indicated the relationships between factors and items for mathematical modeling competency.

Fig 3 indicated all loadings of items were between 0.61 and 0.84. This exceeded the common cut-off value of 0.5 [112].

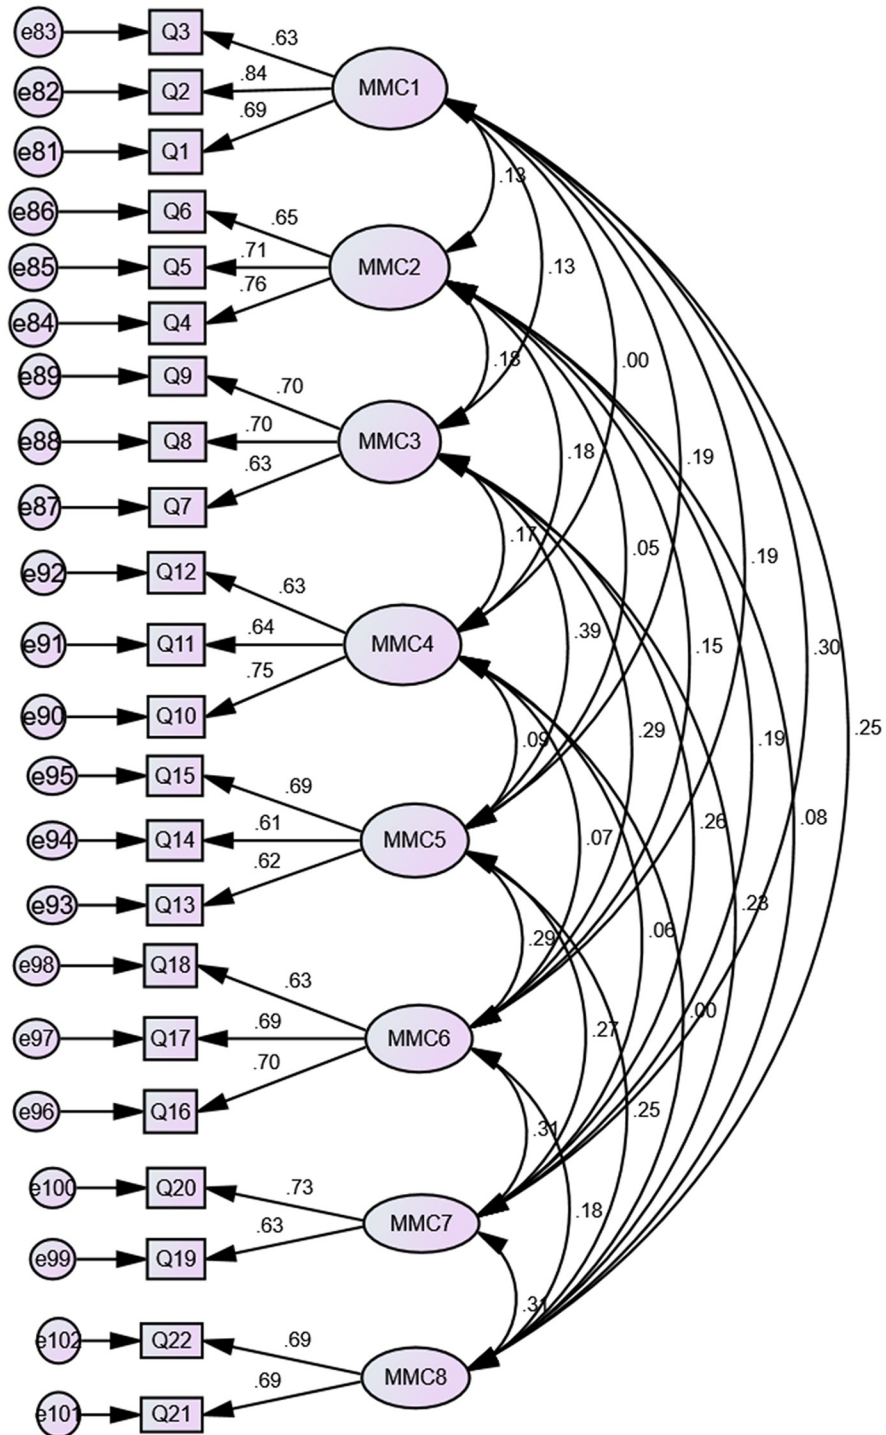

Fig 3. Confirmatory factor analysis path diagram for mathematical modeling.

<https://doi.org/10.1371/journal.pone.0206211.g003>

### Testing the hypothetical structural model

The results of the SEM analysis show the hypothetical structural model of  $\chi^2 = 2540.561$ ,  $\chi^2/df = 1.500$ , RMSEA = 0.031, TLI = 0.948 and CFI = 0.951. All the evaluations resulted in

**Table 2. Results of the hypothetical structural model.**

| Parameter   | Coefficient |
|-------------|-------------|
| $\chi^2$    | 2540.561    |
| $\chi^2/df$ | 1.500       |
| RMSEA       | 0.031       |
| TLI         | 0.948       |
| CFI         | 0.951       |

**Note.**  $\chi^2$ : Chi-square goodness of fit; df: Degrees of freedom; CFI: Comparative fit index; TLI: Tucker-Lewis index (TLI); RMSEA: Root mean square error of approximation.

<https://doi.org/10.1371/journal.pone.0206211.t002>

acceptable model fit for the Indonesian context in this research. All factor loadings amongst the four sub-constructs of metacognition ranged from 0.66 to 0.77, and those for the six sub-constructs of achievement goals ranged from 0.80 to 0.98. The factor loading values exceeded the desirable standard of 0.50 [112]. Table 2 shows that the hypothetical structural model is excellent.

Moreover, the model of CFA illustrated in Fig 4 became the finalized model that indicated relationships among achievement goals, metacognition, and mathematical modeling competency in the Indonesian context. The final model derived from the current research can be utilized as an alternative in explaining the previous research on the relationships between achievement goals, metacognition, and mathematical modeling competency.

### Relationships between achievement goals and mathematical modeling competency

We assumed that achievement goals will positively affect mathematical modeling competency. Hypothesis H1 was fully confirmed because significant relationships were found between achievement goals and mathematical modeling competency ( $\beta = 0.075$ ,  $t = 2.09$ ,  $p < 0.05$ ). The findings revealed that students with achievement goals have good performance in mathematical modeling competency. Achievement goals may be a contributing factor towards mathematical modeling competency.

### Relationships among four metacognition sub-constructs (awareness, planning, cognitive strategy and self-checking) and mathematical modeling competency

We hypothesised that four metacognition sub-constructs, namely, awareness, planning, cognitive strategy and self-checking, positively affect mathematical modeling competency. Hypothesis H2 was fully supported because significant relationships were derived between awareness and mathematical modeling competency ( $\beta = 0.074$ ,  $t = 2.30$ ,  $p < 0.05$ ), planning and mathematical modeling competency ( $\beta = 0.078$ ,  $t = 2.19$ ,  $p < 0.05$ ), cognitive strategy and mathematical modeling competency ( $\beta = 0.077$ ,  $t = 2.33$ ,  $p < 0.05$ ) and self-checking and mathematical modeling competency ( $\beta = 0.070$ ,  $t = 2.39$ ,  $p < 0.05$ ). Students' awareness, planning, cognitive strategy and self-checking were vital in encouraging students' mathematical modeling competency.

### Mediating effects of the four metacognition sub-constructs on the relationships between achievement goals and mathematical modeling competency

We expected a mediating effect of awareness, planning, cognitive strategy and self-checking on the relationships between achievement goals and mathematical modeling competency. Table 3 lists the results of mediating effect analysis using AMOS software.

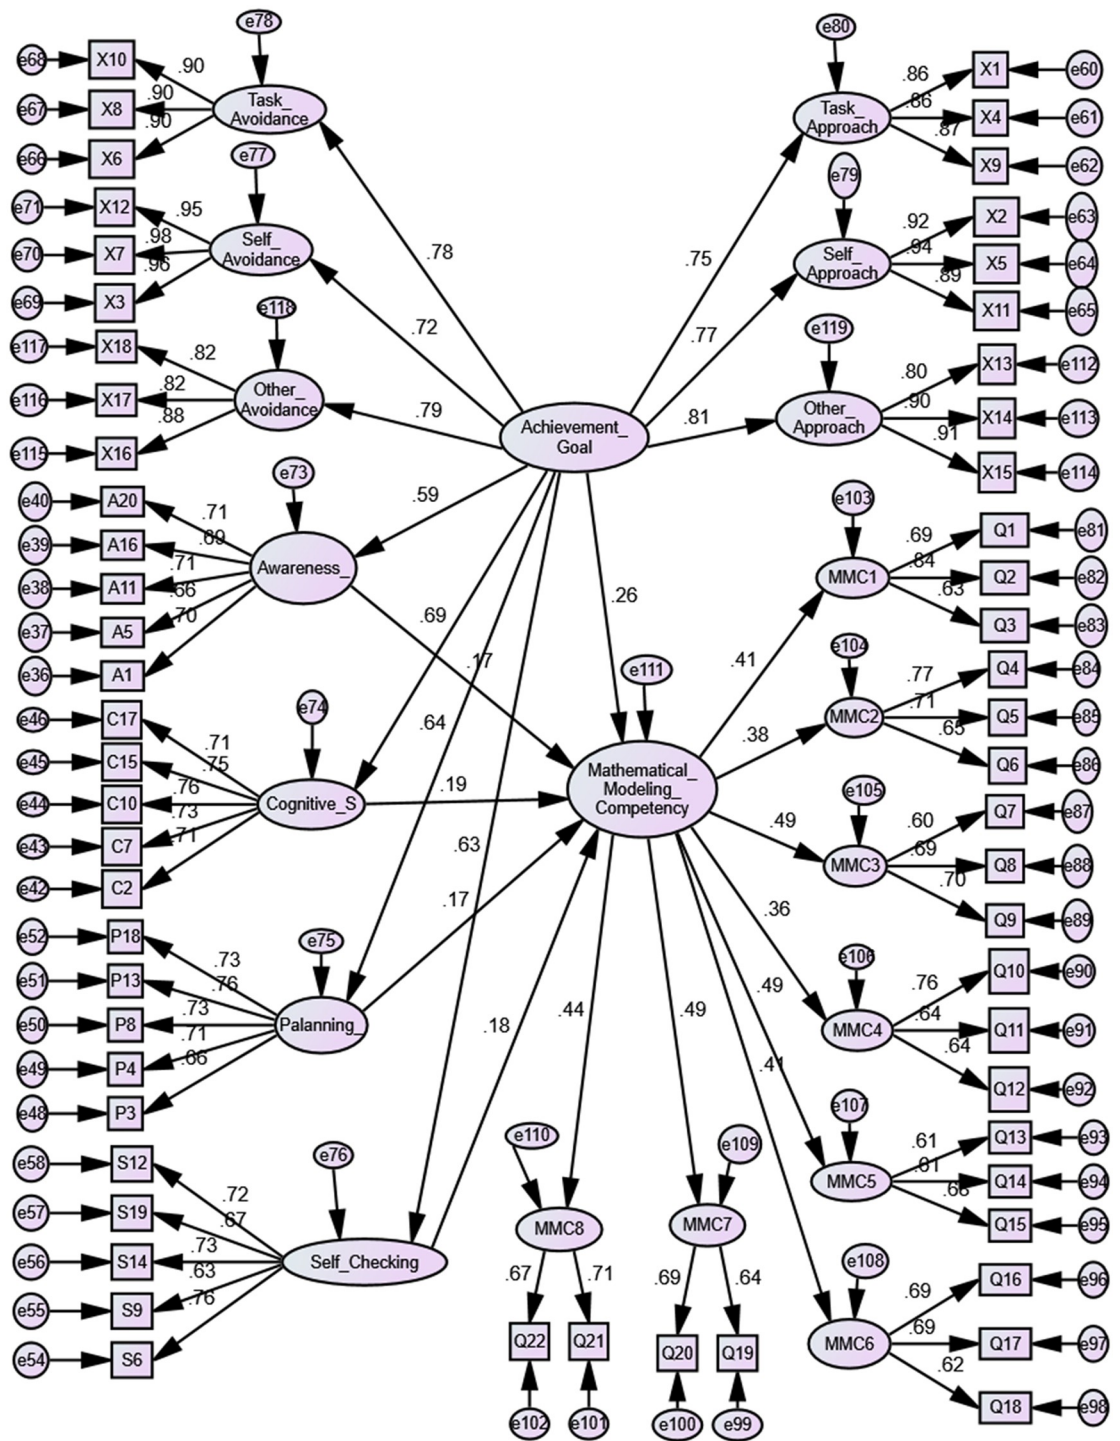

Fig 4. Final model of the study.

<https://doi.org/10.1371/journal.pone.0206211.g004>

Table 3 shows the outputs of the mediating effect of four metacognition sub-constructs, namely, awareness, planning, cognitive strategy and self-checking, on mathematical modeling competency. A positive partial mediating effect of awareness ( $\beta = 0.17, p < 0.05$ ), cognitive strategy ( $\beta = 0.19, p < 0.05$ ), planning ( $\beta = 0.17, p < 0.05$ ) and self-checking ( $\beta = 0.18,$

Table 3. Output of mediating effect.

| Path      | Direct effect |                 | Indirect effect |                 | Result            |
|-----------|---------------|-----------------|-----------------|-----------------|-------------------|
|           | $\beta$       | <i>p</i> values | $\beta$         | <i>p</i> values |                   |
| AG→AW→MMC | 0.075         | 0.037           | 0.17            | 0.000           | Partial Mediation |
| AG→CS→MMC | 0.075         | 0.037           | 0.19            | 0.000           | Partial Mediation |
| AG→PL→MMC | 0.075         | 0.037           | 0.17            | 0.000           | Partial Mediation |
| AG→SC→MMC | 0.075         | 0.037           | 0.18            | 0.000           | Partial Mediation |

<https://doi.org/10.1371/journal.pone.0206211.t003>

$p < 0.05$ ) for achievement goals on mathematical modeling competency ( $\beta = 0.26, p < 0.05$ ) was found. The mediating effects were tested using the Sobel test analysis to confirm the mediating effect of the four metacognition sub-constructs. Awareness is a significant partial mediator for achievement goals ( $z = 2.04, p < 0.05$ ) on mathematical modeling competency. Cognitive strategy is a significant partial mediator for achievement goals ( $z = 2.05, p < 0.05$ ) on mathematical modeling competency. Planning is a significant partial mediator for achievement goals ( $z = 2.04, p < 0.05$ ) on mathematical modeling competency. Self-checking is a significant partial mediator for achievement goals ( $z = 2.05, p < 0.05$ ) on mathematical modeling competency. Overall, achievement goals exert a direct significant effect on mathematical modeling competency ( $\beta = 0.26, p < 0.05$ ). Thus, hypothesis H3 was fully confirmed.

## Discussion

This study examined the relationship between metacognition and achievement goals which might influence mathematical modeling competency in students of mathematics education programs. Considering the important role of metacognition for mathematical modeling competency in the current literature [29], the mediating effects of four metacognition sub-constructs, namely, awareness, planning, cognitive strategy and self-checking, on achievement goals and mathematical modeling competency have been rarely explored.

### Effects of achievement goals on mathematical modeling competency

The significant direct relationship between achievement goals and mathematical modeling competency was confirmed in our study regardless whether due to task-approach goal, task-avoidance goal, self-approach goal, self-avoidance goal, other-approach goal or other-avoidance goal. Our findings agreed with those of previous research [73, 75]. Students who integrate mastery- and performance-oriented goals support their success in mathematical modeling competency. The reason for this positive relationship is that students who utilised mastery goals were likely to set deep learning [86], effective strategy use [74], perceived competence [73] and material absorption in class [69]. Given that modeling activities also refer to group works to find solutions, mastery goals encourage students' teacher-student relations, peer inclusion and peer conflict [76]. This deduction was clarified by Liu et al. [71], who found that students who focused on performance goals predict positive learning outcomes, but the relationship was insignificant [94]. The hypothesis relationship between sub-constructs of achievement goals and mathematical modeling competency should be examined in future research because previous findings of relationship amongst sub-constructs of achievement goals and learning results were inconsistent.



## Effects of the four metacognition dimensions (awareness, planning, cognitive strategy and self-checking) on mathematical modeling competency

We found that metacognition positively affected mathematical modeling competency. These results are in line with those of considerable previous research [51, 52, 56]. This relationship may be attributed to metacognition encouraging the use of general strategies such as task analysis, problem representation, prediction, planning, monitoring, checking, reflection and evaluation of success [59] because several mathematical modeling competencies ask students' ability to simplify assumptions, clarify goals and formulate problems. Moreover, the use of metacognitive strategies allows students to be sensitive in understanding a problem appropriately and make few errors in the learning process, thereby improving their self-regulation skills and self-confidence [60]. Surprisingly, according to the obtained results in the current study, weak relationship exists between mathematical modeling competency and their level of awareness, planning, cognitive strategy and self-checking. Our results partially endorsed prior investigation. No significant correlation between metacognitive self-reported strategy use (planning and monitoring) and mathematical modeling competence [117] were not confirmed in the present research. One possible explanation for the findings may be population we employed. Metacognition increase with age and task specific ability [118] and advanced learners in complicated assignments [119]. Moreover, strategies for regulating and strategies for evaluating among students of grade 9 are low [120]. Thus, the four metacognition dimensions including awareness, planning, cognitive strategy and self-checking in the current research are vital factors in mathematical modeling classroom during modeling cycle.

The current findings showed that the four metacognition dimensions including awareness, planning, cognitive strategy and self-checking partially mediate mathematical modeling competency. These findings are consistent with previous research that found metacognition was a partial mediator [121, 122], and in particular awareness [123], planning [124], cognitive strategy [125] and self-checking [126, 127] as mediators in academic achievement. However, we failed to reiterate a prior study which stated that only three of the four sub-constructs of metacognition (i.e. planning, cognitive strategy and self-checking) significantly affected mathematical modeling competency [21, 128] while awareness was not a mediator toward mathematical modeling competency. Our findings partially endorsed previous research. A possible reason why students' awareness sometimes works properly towards their mathematical modeling competency in the current research is because metacognition becomes activated in difficult tasks [58]. O'Neil and Abedi [45] emphasized that no metacognition occurs without conscious awareness of it. Therefore, students who utilize great awareness in mathematical modeling classroom are likely to support their planning, cognitive strategy and self-checking. This procedure is vital because students who may fail in mathematical modeling competency if they ignore every single sub-construct of metacognition whilst preparing to participate in a modeling task. In addition, previous studies also have indicated awareness as an insignificant predictor of mathematical modeling competency. Sahin and Kendir [60] found that children usually become successful in problem solving as they are aware of what they need to perform and can supervise procedures.

## Effects of achievement goals on mathematical modeling competency via awareness, planning, cognitive strategy and self-checking

The present study indicates that the four metacognition dimensions including awareness, planning, cognitive strategy and self-checking are positive partial mediators because they improve the association between achievement goals and mathematical modeling competency.

The current findings confirm the hypothesis that students with great metacognition are likely to mediate relationship between achievement goals and mathematical modeling competency. These findings support previous research which indicated that metacognition is either a full mediator [93, 94] or a partial mediator [107]. Yildirim [21] found that self-checking, cognitive strategy and planning mediate the development of modeling competencies. Awareness, planning, cognitive strategy and self-checking may be meaningful factors that relate students' achievement goals and their mathematical modeling competency. The reason for this relationship is that the mediating effects of awareness, planning, cognitive strategy and self-checking effectively control self-regulatory problems during goal striving although students have strong achievement goals [96]. Therefore, students' awareness, planning, cognitive strategy and self-checking should be supported in mathematical modeling classroom.

## Conclusions and suggestions

The results of this research provide further evidence that achievement goals and metacognition positively influence mathematical modeling competency. In addition, the four metacognition dimensions, namely, awareness, planning, cognitive strategy and self-checking are positive partial mediators. Awareness, planning, cognitive strategy and self-checking in mathematical modeling classroom enhance the relationship between achievement goals and mathematical modeling competency. One practical implication for educators is that they should support students in order to improve their metacognition and achievement goals in solving complex problems in mathematical modeling competencies by providing appropriate learning approaches and offering an adequate learning environment. Moreover, based on the obtained findings, awareness, planning, cognitive strategy and self-checking are positive partial mediators between achievement goals and mathematical modeling competency. This means that besides teachers should encourage students to hold a robust achievement goals, they need to adopt good metacognition in the mathematical modeling class in term of maximizing their achievement in mathematical modeling competency.

Our research has some limitations. First, it is difficult to describe fully of the relationship between two or more variables in correlational study although SEM propose the results about causal relationships. Second, the definition of mathematical modeling competency employed in this study is slightly restricted. The current research involves mathematical modeling competency in a content perspective. Thus, the effect of achievement goals and metacognition towards mathematical modeling competency in modeling as a vehicle should be analyzed. Hence, an experimental study involving mathematical modeling competency as a vehicle should be conducted. Future research also should explore the effect of achievement goal sub-constructs on metacognition and mathematical modeling competency because of inconsistency in previous findings. The role of metacognition sub-constructs in achievement goal sub-constructs and mathematical modeling competency also needs to be examined.

## Supporting information

**S1 File. Letter of permission from the educational planning and research division.**  
(PDF)

**S2 File. Data availability.**  
(XLS)

## Acknowledgments

We would like to thank Mrs Aulia Stephani for her helps in data collate.

## Author Contributions

**Conceptualization:** Riyan Hidayat.

**Data curation:** Riyan Hidayat.

**Formal analysis:** Riyan Hidayat.

**Funding acquisition:** Riyan Hidayat.

**Investigation:** Riyan Hidayat.

**Methodology:** Riyan Hidayat.

**Project administration:** Riyan Hidayat.

**Resources:** Riyan Hidayat.

**Software:** Riyan Hidayat.

**Supervision:** Hutkemri Zulnaldi, Sharifah Norul Akmar Syed Zamri.

**Validation:** Riyan Hidayat.

**Visualization:** Riyan Hidayat.

**Writing – original draft:** Riyan Hidayat.

**Writing – review & editing:** Riyan Hidayat, Hutkemri Zulnaldi, Sharifah Norul Akmar Syed Zamri.

## References

1. English, L. D. Mathematical modeling: Linking mathematics, science and arts in the primary curriculum. In: 2nd International Symposium on Mathematics and its Connections to the Arts and Sciences (MACAS2), Odense, Denmark; 2008
2. Gainsburg J. The mathematical modeling of structural engineers. *Mathematical Thinking and Learning*. 2006; 8: 3–36. [https://doi.org/10.1207/s15327833mtl0801\\_2](https://doi.org/10.1207/s15327833mtl0801_2)
3. Kartal O, Dunya BA, Diefes-Dux A, Zawojewski S. The relationship between students' performance on conventional standardized mathematics assessments and complex mathematical modeling problems. *International Journal of Research in Education and Science (IJRES)*. 2016; 2: 239–252.
4. Haines CR, Crouch R. Recognizing constructs within mathematical modeling. *Teaching Mathematics and Its Applications*. In: Lesh R, Galbraith PL, Haines CR, Hurford A, editors. *Modeling Students' Mathematical Modeling Competencies: ICTMA 13*. New York: Springer; 2010. pp. 145–154
5. Hunt J. Communicating big themes in applied mathematics. In: Haines P, Galbraith W, Blum W, Khan S, editors. *Mathematical Modeling (ICTMA12): Education, Engineering and Economics*. Chichester: Horwood Publishing; 2007. pp. 2–24
6. Shahbari JA, Peled I. Modeling in primary school: Constructing conceptual models and making sense of fractions. *International Journal of Science and Mathematics Education*. 2017; 15: 371–391. <https://doi.org/10.1007/s10763-015-9702-x>
7. Eraslan A, Kant S. Modeling processes of 4th-year middle-school students and the difficulties encountered. *Educational Sciences: Theory & Practice*. 2015; 15: 809–825. <https://doi.org/10.12738/estp.2015.3.2556>
8. Gr unewald S. The development of modelling competencies by year 9 students: Effects of a modelling project. In: Stillman GA, Kaiser G, Blum W, Brown JP, editors. *Teaching Mathematical Modelling: Connecting to Research and Practice*. Dordrecht: Springer; 2013. pp. 185–194
9. Wijaya A, Heuvel-panhuizen MVD, Doorman M, Robitzsch A. Difficulties in solving context-based PISA mathematics tasks: An analysis of students' errors. *The Mathematics Enthusiast*. 2014; 11: 555–584.
10. Blomh oj M, Kjeldsen TH. Students' mathematical learning in modelling activities. In: Stillman GA, Kaiser G, Blum W, Brown JP, editors. *Teaching Mathematical Modelling: Connecting to Research and Practice*. Dordrecht: Springer; 2013. pp. 141–151

11. Fu J, Xie J. Comparison of mathematical modelling skills of secondary and tertiary students. In: Stillman GA, Kaiser G, Blum W, Brown JP, editors. *Teaching Mathematical Modelling: Connecting to Research and Practice*. Dordrecht: Springer; 2013. pp. 165–173
12. Delice A, Kertil M. Investigating the representational fluency of pre-service mathematics teachers in a modelling process. *International Journal of Science and Mathematics Education*. 2015; 13: 631–656. <https://doi.org/10.1007/s10763-013-9466-0>
13. Widjaja W. Building awareness of mathematical modelling in teacher education: A case study in Indonesia. In: Stillman GA, Kaiser G, Blum W, Brown JP, editors. *Teaching Mathematical Modelling: Connecting to Research and Practice*. Dordrecht: Springer; 2013. pp. 583–593
14. Yew WT, Akmar SN. Problem solving strategies of selected pre-service secondary school mathematics teachers in Malaysia. *The Malaysian Online Journal of Educational Sciences*. 2016; 4: 17–31.
15. Czochoer JA. How can emphasizing mathematical modeling principles benefit students in a traditionally taught differential equations course? *Journal of Mathematical Behavior*. 2017; 45: 78–94. <https://doi.org/10.1016/j.jmathb.2016.10.006>
16. Jupri A, Drijvers P. Student difficulties in mathematizing word problems in algebra. *Eurasia Journal of Mathematics, Science & Technology Education*. 2016; 12: 2481–2502. <https://doi.org/10.12973/eurasia.2016.1299a>
17. Frejd P, Årlebäck JB. First results from a study investigating swedish upper secondary students' mathematical modelling competencies. In: Kaiser G, Blum W, Borromeo R, Stillman G, editors. *Trends in Teaching and Learning of Mathematical Modelling. International Perspectives on the Teaching and Learning of Mathematical Modelling*. Dordrecht: Springer; 2011. pp. 407–416
18. Mischo C, Maaß K. Which personal factors affect mathematical modelling? The effect of abilities, domain specific and cross domain-competences and beliefs on performance in mathematical modelling. *Journal of Mathematical Modelling and Application*. 2012; 1: 3–19.
19. Schukajlow S, Krug A, Rakoczy K. Effects of prompting multiple solutions for modelling problems on students' performance. *Educational Studies in Mathematics*. 2015; 89: 393–417. <https://doi.org/10.1007/s10649-015-9608-0>
20. Sharma A. Associations between self-efficacy beliefs, self-regulated learning strategies, and students' performance on model-eliciting tasks: An examination of direct and indirect effects. Dissertation, University of Florida; 2013.
21. Yildirim TP. Understanding the modeling skill shift in engineering: The impact of self-efficacy, epistemology, and metacognition. Dissertation, University of Pittsburgh; 2010.
22. Martin TG, Martin AJ, Evans P. Student engagement in the Caribbean region: Exploring its role in the motivation and achievement of Jamaican middle school students. *School Psychology International*. 2017; 38: 184–200.
23. Topcu S, Leana-Tascilar MZ. The role of motivation and self-esteem in the academic achievement of Turkish gifted students. *Gifted Education International*. 2016; 1–16. <https://doi.org/10.1177/0261429416646192>
24. Galbraith P. Forty years on: Mathematical modelling in and for education. In: Downton A, Livy S, Hall J, editors. *40 years on: We are still learning! Proceedings of the 40th Annual Conference of the Mathematics Education Research Group of Australasia (MERGA)*, Melbourne; 2017
25. Kaiser G, Stender P. Complex modelling problems in co-operative, self-directed learning environments. In: Stillman G, Kaiser G, Blum W, Brown JP, editors. *International Perspectives on the Teaching and Learning of Mathematical Modelling*. Dordrecht: Springer; 2013. pp. 277–293
26. Stillman G. Applying metacognitive knowledge and strategies in applications and modelling tasks at secondary school. In: Kaiser G, Ferri RB, Blum W, Stillman G, editors. *International Perspectives on the Teaching and Learning of Mathematical Modelling*. New York: Springer; 2011. pp. 172–187
27. Zimmerman BJ, Campillo M. Motivating self-regulated problem solvers. In: Davidson JE, Sternberg RJ, editors. *The Psychology of Problem Solving*. Cambridge: Cambridge University Press; 2003. pp. 233–262
28. Sekerak J. Competences of mathematical modelling of high school students. *Mathematics Teaching*. 2010; 220: 8–13.
29. Maaß K. What are modelling competencies? *ZDM*. 2006; 38: 113–142.
30. Biccard P, Wessels DCJ. Documenting the development of modelling competencies of grade 7 mathematics students. In: Kaiser G, Ferri RB, Blum W, Stillman G, editors. *Trends in Teaching and Learning of Mathematical Modelling, International Perspectives on the Teaching and Learning of Mathematical Modelling*. New York: Springer; 2011. pp. 375–383
31. Kim YR, Park MS, Moore TJ, Varma S. Multiple levels of metacognition and their elicitation through complex problem-solving tasks. *The Journal of Mathematical Behavior*. 2013; 32: 377–396.

32. Jablonka E, Bergsten C. Theorising in mathematics education research: Differences in modes and quality. *Nordic Studies in Mathematics Education*. 2010; 15: 25–52.
33. Niss M. Mathematical competencies and PISA. In: Stacey K, Turner R, editors. *Assessing Mathematical Literacy*. Switzerland: Springer; 2015. pp. 35–56
34. Lesh R, Lehrer R. Models and modeling perspectives on the development of students and teachers. *Mathematical Thinking and Learning*. 2003; 5: 109–129.
35. Gravemeijer K. Preamble: From models to modeling. In: Gravemeijer K, Lehrer R, Van Oers B, Verschaffel L, editors. *Symbolizing, Modeling and Tool Use in Mathematics Education*. Dordrecht: Kluwer Academic Publishers; 2002. pp. 7–22
36. Greer B, Verschaffel L. Modelling competencies-Overview. In: Blum W, Henn HW, Galbraith PL, Niss M, editors. *Modelling and Applications in Mathematics Education: The 14th ICMI Study*. New York: Springer; 2007. pp. 219–224
37. Houston K. Assessing the “Phases” of mathematical modelling. In: Blum W, Henn HW, Galbraith PL, Niss M, editors. *Modelling and Applications in Mathematics Education: The 14th ICMI Study*. New York: Springer; 2007. pp. 249–255
38. Chinnappan M, Thomas M. Teachers function schemas and their role in modelling. *Mathematics Education Research Journal*. 2003; 2: 151–170.
39. Blomhøj M, Jensen T. Developing mathematical modelling competence: Conceptual clarification and educational planning. *Teaching Mathematics and Its Applications*. 2003; 3: 123–139.
40. Blum W. ICMI study 14: Applications and modelling in mathematics education-Discussion document. *Educational Studies in Mathematics*. 2002; 51: 149–171.
41. Haines C, Crouch R. Recognizing constructs within mathematical modelling. *Teaching Mathematics and Its Applications*. 2001; 20: 129–138.
42. Papaleontiou-Louca E. *Metacognition and theory of mind*. Newcastle: Cambridge Scholars Publishing; 2008.
43. Flavell JH. Metacognitive aspects of problem solving. In: Resnick LB, editors. *The Nature of Intelligence*. Hillsdale: Erlbaum; 1976. pp. 231–235
44. Flavell JH, Miller PH, Miller SA. *Cognitive development (4th ed)*. Englewood Cliffs, NJ: Prentice-Hall; 2002.
45. O’Neil HF, Abedi J. Reliability and validity of a state metacognitive inventory: Potential for alternative assessment. *The Journal of Educational Research*. 1996; 89: 234–245. <https://doi.org/10.1080/00220671.1996.9941208>
46. Brown AL, DeLoache JS. Skills, plans, and self-regulation. In Siegel RS (Ed.), *Children’s thinking: What develops?* (p. 3–35). Hillsdale, N.J: Erlbaum; 1978
47. Flavell JH. Metacognition and cognitive monitoring. A new area of cognitive-developmental inquiry. *American Psychologist*. 1979; 34, 906–911
48. Schraw G, Moshman D. Metacognitive theories. *Educational Psychology Review*. 1995; 7(4), 351–371. <https://doi.org/10.1007/BF02212307>
49. Lesh R, Zawojewski JS. Problem solving and modeling. In: Lester JFK, editors. *The Second Handbook of Research on Mathematics Teaching and Learning*. National Council of Teachers of Mathematics, Charlotte, NC: Information Age Publishing; 2007. pp. 763–804
50. Livingston JA. Metacognition: An overview. *International Journal of Science Education*. 2003; 26.
51. Bonnett V, Yuill N, Carr A. Mathematics, mastery and metacognition: How adding a creative approach can support children in maths. *Educational & Child Psychology*. 2016; 34: 83–94.
52. Callan GL, Marchant GJ, Finch WH, German RL. Metacognition, strategies, achievement, and demographics: Relationships across countries. *Educational Sciences: Theory & Practice*. 2016; 16: 1485–1502. <https://doi.org/10.12738/estp.2016.5.0137>
53. Erbas AK, Bas S. The contribution of personality traits, motivation, academic risk-taking and metacognition to the creative ability in mathematics. *Creativity Research Journal*. 2015; 27: 299–307. <https://doi.org/10.1080/10400419.2015.1087235>
54. Özcan ZÇ. The relationship between mathematical problem-solving skills and self-regulated learning through homework behaviours, motivation, and metacognition. *International Journal of Mathematical Education in Science and Technology*. 2016; 47: 408–420. <https://doi.org/10.1080/0020739X.2015.1080313>
55. Tzohar-Rozen M, Kramarski B. Metacognition, motivation and emotions: Contribution of self-regulated learning to solving mathematical problems. *Global Education Review*. 2014; 1: 76–95.

56. Yusnaeni A., Corebima D. Empowering students' metacognitive skills on sscs learning model integrated with metacognitive strategy. *The International Journal of Social Sciences and Humanities Invention*. 2017; 4: 3476–3481.
57. Hidoğlu ÇN, Bukova GE. Transitions between cognitive and metacognitive activities in mathematical modelling process within a technology enhanced environment. *Necatibey Eğitim Fakültesi Elektronik Fen ve Matematik Eğitimi Dergisi*. 2016; 10: 313–350.
58. Iiskala T, Vauras M, Lehtinen E, Salonen P. Socially shared metacognition of dryads of pupils in collaborative mathematical problem-solving processes. *Learning and Instruction*. 2011; 21: 379–393. <https://doi.org/10.1016/j.learninstruc.2010.05.002>
59. Pennequin V, Sorel O, Nanty I, Fontaine R. Metacognition, executive functions and aging: The effect of training in the use of metacognitive skills to solve mathematical word problems. *Thinking & Reasoning*. 2010; 16: 198–220. <https://doi.org/10.1007/s10804-010-9098-3>
60. Sahin MS, Kendir F. The effect of using metacognitive strategies for solving geometry problems on students' achievement and attitude. *Educational Research and Reviews*. 2013; 8: 1777–1792.
61. Özsoy G. An investigation of the relationship between metacognition and mathematics achievement. *Asia Pacific Education Review*. 2011; 12: 227–235. <https://doi.org/10.1007/s12564-010-9129-6>
62. García T, Rodríguez C, González-Castro P, González-Pienda JA, Torrance M. Elementary students' metacognitive processes and post-performance calibration on mathematical problem-solving tasks. *Metacognition and Learning*. 2016; 11: 139–170. <https://doi.org/10.1007/s11409-015-9139-1>
63. Karaali G. Metacognition in the classroom: Motivation and self-awareness of mathematics learners. *Problems, Resources, and Issues in Mathematics Undergraduate Studies (PRIMUS)*. 2015; 25: 439–452. <https://doi.org/10.1080/10511970.2015.1027837>
64. Händel M, Lockl K, Heydrich J, Weinert S, Artelt C. Assessment of metacognitive knowledge in students with special educational needs. *Metacognition and Learning*. 2014; 9: 333–352. <https://doi.org/10.1007/s11409-014-9119-x>
65. Hessels MGP, Schwab S. Mathematics performance and metacognitive behaviors during task resolution and the self-concept of students with and without learning disabilities in secondary education. *Insights into Learning Disabilities*. 2015; 12: 57–72.
66. Ames C. Classrooms: Goals, structures, and student motivation. *Journal of Educational Psychology*. 1992; 84: 261–271.
67. Elliot AJ, Church MA. A hierarchical model of approach and avoidance achievement motivation. *Journal of Personality and Social Psychology*. 1997; 72: 218–232. <https://doi.org/10.1037//0022-3514.72.1.218>
68. Nicholls JG. Achievement motivation: Conceptions of ability, subjective experience, task choice, and performance. *Research on Motivation in Education*. 1984; 1: 328–346
69. Elliot AJ, Murayama K, Pekrun R. A 3 × 2 achievement goal model. *Journal of Educational Psychology*. 2011; 103: 632–648. <https://doi.org/10.1037/a0023952>
70. Ames C, Archer J. Achievement goals in the classroom: Students' learning strategies and motivation processes. *Journal of Educational Psychology*. 1988; 80: 260–267. <https://doi.org/10.1037/0022-0663.80.3.260>
71. Liu J, Xiang P, Lee J. Developing physical literacy in K-12 physical education through achievement goal theory. *Journal of Teaching in Physical Education*. 2017; 36: 292–302. <https://doi.org/10.1123/jtpe.2017-0030>
72. Lower LM, Newman TJ, Pollard WS. Examination of the 3x2 achievement goal model in recreational sport: Associations with perceived benefits of sport participation. *International Journal of Sport Management, Recreation & Tourism*. 2016; 26: 44–53.
73. Masclet N, Elliot AJ, Cury F. Extending the 3x2 achievement goal model to the sport domain: The 3x2 achievement goal questionnaire for sport. *Psychology of Sport and Exercise*. 2015; 17: 7–14. <https://doi.org/10.1016/j.psychsport.2014.11.001>
74. Wynne HM. Integrating the demonstration orientation and standards-based models of achievement goal theory. Dissertation, Fordham University; 2014.
75. Maretasani LD, Masrukan, Dwijanto. Problem solving ability and metacognition based goal orientation on problem based learning. In: Saptono S, Masturi A, Purwinarko, Alighiri D, editors. *International Conference on Mathematics, Science, and Education 2016 (ICMSE 2016) Problem*, Semarang: Faculty of Mathematics and Natural Sciences Semarang State University; 2016
76. Polychroni F, Hatzichristou C, Sideridis G. The role of goal orientations and goal structures in explaining classroom social and affective characteristics. *Learning and Individual Differences*. 2012; 22: 207–217. <https://doi.org/10.1016/j.lindif.2011.10.005>

77. Senko C, Harackiewicz JM. Achievement goals, task performance, and interest: Why perceived goal difficulty matters. *Personality & Social Psychology Bulletin*. 2005; 31: 1739–1753. <https://doi.org/10.1177/0146167205281128> PMID: 16254093
78. Levy I, Kaplan A, Patrick H. Early adolescents' achievement goals, social status, and attitudes towards cooperation with peers. *Social Psychology of Education*. 2004; 7: 127–159. <https://doi.org/10.1023/B:SPOE.0000018547.08294.b6>
79. Hagstrom F, White M. Talk and task mastery: The importance of socially shared talk during computer-based problem solving. *Clinical Linguistics & Phonetics*. 2006; 20: 591–598. <https://doi.org/10.1080/02699200500266554> PMID: 17056490
80. Ferri RB, Lesh R. Should interpretation systems be considered to be models if they only function implicitly? In: Stillman G, Kaiser G, Blum W, Brown JP, editors. *International Perspectives on the Teaching and Learning of Mathematical Modelling*. Dordrecht: Springer; 2013. pp. 57–66
81. Pahljina-Reinić R, Kolić-Vehovec S. Average personal goal pursuit profile and contextual achievement goals: Effects on students' motivation, achievement emotions, and achievement. *Learning and Individual Differences*. 2017; 1–8. <https://doi.org/10.1016/j.lindif.2017.01.020>
82. Stillman GA, Brown JP, Galbraith P. Challenges in modelling challenges: Intents and Purposes. In: Stillman G, Kaiser G, Blum W, Brown JP, editors. *International Perspectives on the Teaching and Learning of Mathematical Modelling*. Dordrecht: Springer; 2013. pp. 217–227
83. Belenky DM, Nokes-malach TJ. Mastery-approach goals and knowledge transfer: An investigation into the effects of task structure and framing instructions. *Learning and Individual Differences*. 2013; 25: 21–34. <https://doi.org/10.1016/j.lindif.2013.02.004>
84. Erhel S, Jamet E. The effects of goal-oriented instructions in digital game-based learning. *Interactive Learning Environments*. 2015; 4820: 1–14. <https://doi.org/10.1080/10494820.2015.1041409>
85. King RB, G FA Jr., Watkins DA. A cross-cultural analysis of achievement and social goals among Chinese and Filipino students. *Social Psychology of Education*. 2014; 17: 439–455. <https://doi.org/10.1007/s11218-014-9251-0>
86. Soltaninejad M. Investigating predictive role of 2x2 achievement goal orientations on learning strategies with structural equation modeling. *The Malaysian Online Journal of Educational Science*. 2015; 3: 21–30.
87. Ge X, Law V, Huang K. Detangling the interrelationships between self-regulation and ill-structured problem solving in problem-based learning. *Interdisciplinary Journal of Problem-Based Learning*. 2016; 10: <https://doi.org/10.7771/1541-5015.1622>
88. Lazonder AW, Rouet JF. Information problem solving instruction: Some cognitive and metacognitive issues. *Computers in Human Behavior*. 2008; 24: 753–765. <https://doi.org/10.1016/j.chb.2007.01.025>
89. Méndez-Giménez A, Cecchini-Estrada JA, Fernández-Río J, Saborit JAP, Méndez-Alonso D. 3x2 classroom goal structures, motivational regulations, self-concept, and affectivity in secondary school. *The Spanish Journal of Psychology*. 2017; 20: <https://doi.org/10.1017/sjp.2017.37> PMID: 28929988
90. Stoeber J, Haskew AE, Scott C. Perfectionism and exam performance: The mediating effect of task-approach goals. *Personality and Individual Differences*. 2015; 74: 171–176. <https://doi.org/10.1016/j.paid.2014.10.016>
91. Yang Y, Taylor J, Cao L. The 3 x 2 achievement goal model in predicting online student test anxiety and help-seeking. *International Journal of E-Learning & Distance Education*. 2016; 32: 1–16.
92. Dweck CS. Motivational processes affecting learning. *American Psychologist*. 1986; 41: 1040–1048. <https://doi.org/10.1037/0003-066X.41.10.1040>
93. Lindsay PC. Assessing the relationships among goal orientation, test anxiety, self-efficacy, metacognition, and academic performance. Dissertation, Northern Illinois University; 2010.
94. Mirzaei F, Phang FA, Sulaiman S, Kashefi H, Ismail Z. Mastery goals, performance goals, students' beliefs and academic success: Metacognition as a mediator. *Procedia-Social and Behavioral Sciences*. 2012; 46: 3603–3608. <https://doi.org/10.1016/j.sbspro.2012.06.113>
95. Johnson ML, Kestler JL. Achievement goals of traditional and nontraditional aged college students: Using the 3x2 achievement goal framework. *International Journal of Educational Research*. 2013; 61: 48–59. <https://doi.org/10.1016/j.ijer.2013.03.010>
96. Gollwitzer PM, Sheeran O. Implementation intentions and goal achievement: A meta-analysis of effects and process. *Advances in Social Psychology*. 2006; 38: 60–116. [https://doi.org/10.1016/S0065-2601\(06\)38002-1](https://doi.org/10.1016/S0065-2601(06)38002-1)
97. Ford JK, Smith EM, Consulting A, Weissbein DA, Gully SM, Salas E. Relationships of goal orientation, metacognitive activity, and practice strategies with learning outcomes and transfer. *Journal of Applied Psychology*. 1998; 83: 218–233. <https://doi.org/10.1037/0021-9010.83.2.218>

98. Vrugt A, Oort F. Metacognition, achievement goals, study strategies and academic achievement: Pathways to achievement. *Metacognition And Learning*. 2008; 30: 123–146. <https://doi.org/10.1007/s11409-008-9022-4>
99. Gardner AK, Jabbour IJ, Williams BH, Huerta S. Different goals, different pathways: the role of metacognition and task engagement in surgical skill acquisition. *Journal of Surgical Education*. 2016; 73: 61–65. <https://doi.org/10.1016/j.jsurg.2015.08.007> PMID: 26395402
100. Gul F, Shehzad S. Relationship between metacognition, goal orientation and academic achievement. *Procedia-Social and Behavioral Sciences*. 2012; 47: 1864–1868. <https://doi.org/10.1016/j.sbspro.2012.06.914>
101. King RB, Mcinerney DM. Do goals lead to outcomes or can it be the other way around?: Causal ordering of mastery goals, metacognitive strategies, and achievement. *British Journal of Educational Psychology*. 2016; 86: 296–312. <https://doi.org/10.1111/bjep.12107> PMID: 26924161
102. Zafarmand A. A structural equation modeling of EFL learners' goal orientation, metacognitive awareness, and self-efficacy. *Advances in Language and Literary Studies*. 2014; 5: 112–124. <https://doi.org/10.7575/aial.v.5n.6p.112>
103. Kadioglu C, Kondakci EU. Relationship Between learning strategies and goal orientations: A multilevel analysis. *Eurasian Journal of Educational Research*. 2014; 56: 1–22.
104. Coutinho SA, & Neuman G. A model of metacognition, achievement goal orientation, learning style and self-efficacy. *Learning Environments Research*. 2008; 11: 131–151. <https://doi.org/10.1007/s10984-008-9042-7>
105. Farsani MA, Beikmohammadi M, Mohebbi A. Self-regulated learning, goal-oriented learning and academic writing performance of undergraduate iranian efl learners. *The Electronic Journal for English as A Second Language*. 2014; 18: 1–20.
106. McCollum DL, Kajs LT. Applying goal orientation theory in an exploration of student motivations in the domain of educational leadership. *Educational Research Quarterly*. 2007; 31: 45–59.
107. Coutinho SA. The relationship between goals, metacognition, and academic success. *Educate*. 2007; 7: 39–47.
108. Fraenkel JR, Wallen NE. *How to Design and Evaluate Research in Education*. New York: McGraw-Hill; 2009.
109. Houston K, Neill N. Investigating students' modelling skills. In: Ye Q, Blum W, Houston KS, Jian Q, editors. *Mathematical Modelling in Education and Culture*. Chichester: Horwood. pp. 54–66. 2001.
110. Tavakol M, Dennick R. Making sense of Cronbach's alpha. *International Journal of Medical Education*. 2011; 2: 53–55. <https://doi.org/10.5116/ijme.4dfb.8dfd> PMID: 28029643
111. Gillet N, Lafrenière MAK, Huyghebaert T, Fouquereau E. Autonomous and controlled reasons underlying achievement goals: Implications for the 3 x 2 achievement goal model in educational and work settings. *Motivation and Emotion*. 2015; 39: 858–875. <https://doi.org/10.1007/s11031-015-9505-y>
112. Hair JF, Black WC, Babin BJ, Anderson RE. *Multivariate Data Analysis (7th Edition)*. Englewood Cliffs, NJ: Prentice Hall; 2010.
113. Kline RB. *Principles and Practice of Structural Equation Modeling*. New York: The Guilford Press; 2005.
114. Awang Z. *Structural Equation Modeling Using Amos Graphic*. Shah Alam: UiTM Press; 2012.
115. Mackinnon DP, Lockwood CM, Hoffman JM, West SG, Sheets V. A comparison of methods to test mediation and other intervening variable effects. *Psychological Methods*. 2002; 7: 83–104. <https://doi.org/10.1037/1082-989X.7.1.83> PMID: 11928892
116. Baron RM, Kenny DA. The moderator-mediator variable distinction in social psychological research: Conceptual, strategic, and statistical considerations. *Journal of Personality and Social Psychology*. 1986; 51: 1173–1182.
117. Schukajlow S, Leiss D. Selbstberichtete Strategienutzung und mathematische Modellierungskompetenz. *Journal für Mathematikdidaktik*. 2011; 32, 53–77. <https://doi.org/10.1007/s13138-010-0023-x>
118. Bryce D, Whitebread D. The development of metacognitive skills: Evidence from observational analysis of young children's behavior during problem-solving. *Metacognition Learning*. 2012; 7, 197–217
119. Prins FJ, Veenman MVJ, Elshout JJ. The impact of intellectual ability and metacognition on learning: New support for the threshold of problematicity theory. *Learning and Instruction*. 2006; 16, 374e387
120. Vorhölter K. Conceptualization and measuring of metacognitive modelling competencies: Empirical verification of theoretical assumptions. *ZDM Mathematics Education*. 2018; 50: 343–354. <https://doi.org/10.1007/s11858-017-0909-x>
121. Coutinho SA. The relationship between goals, metacognition, and academic success. *Educate*. 2007; 7(1), 39–47



122. Sariçam H, Çelik İ, Sakız H. Mediator role of metacognitive awareness in the relationship between educational stress and school Burnout among adolescents. *Journal of Education and Future*. 2017; 11, 159–175
123. Hassan NM, Rahman S. Problem solving skills, metacognitive awareness, and mathematics achievement: A mediation model. *The New Educational Review*. 2017; 49, 201–212.
124. Wiedemann AU, Schuz B, Sniehotta F, Scholz U, Schwarzer R. Disentangling the relation between intentions, planning, and behaviour: A moderated mediation analysis. *Psychology & Health*. 2009; 24, 67–79. <https://doi.org/10.1080/08870440801958214> PMID: 20186640
125. Wang L, Yan F. Emotion regulation strategy mediates the relationship between goal orientation and job search behavior among university seniors. *Journal of Vocational Behavior*. 2018; 108, 1–12. <https://doi.org/10.1016/j.jvb.2018.05.011>
126. Laitner MH, Minski SA, Perri MG. The role of self-monitoring in the maintenance of weight loss success. *Eating Behaviors*. 2016; 21, 193–197. <https://doi.org/10.1016/j.eatbeh.2016.03.005> PMID: 26974582
127. Turk MW, Elci OU, Wang J, Sereika SM, Ewing LJ, Acharya SD, et al. Self-monitoring as a mediator of weight loss in the SMART randomized clinical trial. *International Journal of Behavioral Medicine*. 2013; 20, 1–10.
128. Wilson J, Clarke D. Towards the modelling of mathematical metacognition. *Mathematics Education Research Journal*. 2004; 16, 25–48.
